# Supplementary material for: Facile preparation of antibacterial hydrogel with multi-functions based on carboxymethyl chitosan and oligomeric procyanidin
Source: Royal Society of Chemistry journal article supplement (doi:10.1039/d2ra04049b), 2022-01-01
Supplement: d2ra04049b1.pdf [file d2ra04049b1.pdf]

## Facile preparation of antibacterial hydrogel with multi-functions based on carboxymethyl chitosan and oligomeric procyanidin

Yuanmeng He, Shen Guo, Rong Chang, Dan Zhang, Yikun Ren, Fangxia Guan\*, Minghao Yao\*

School of Life Science, Zhengzhou University, 100 Science Road, Zhengzhou 450001, P. R. China

\*E-mail: yao453343550@126.com, guanfangxia@126.com

### Supplementary Figures

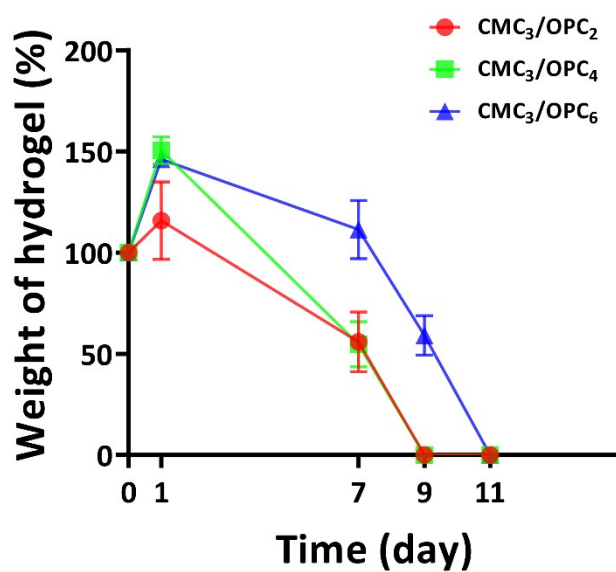

Figure S1 Degradation of CMCS/OPC hydrogels in PBS. Data are reported as means  $\pm$  SD.

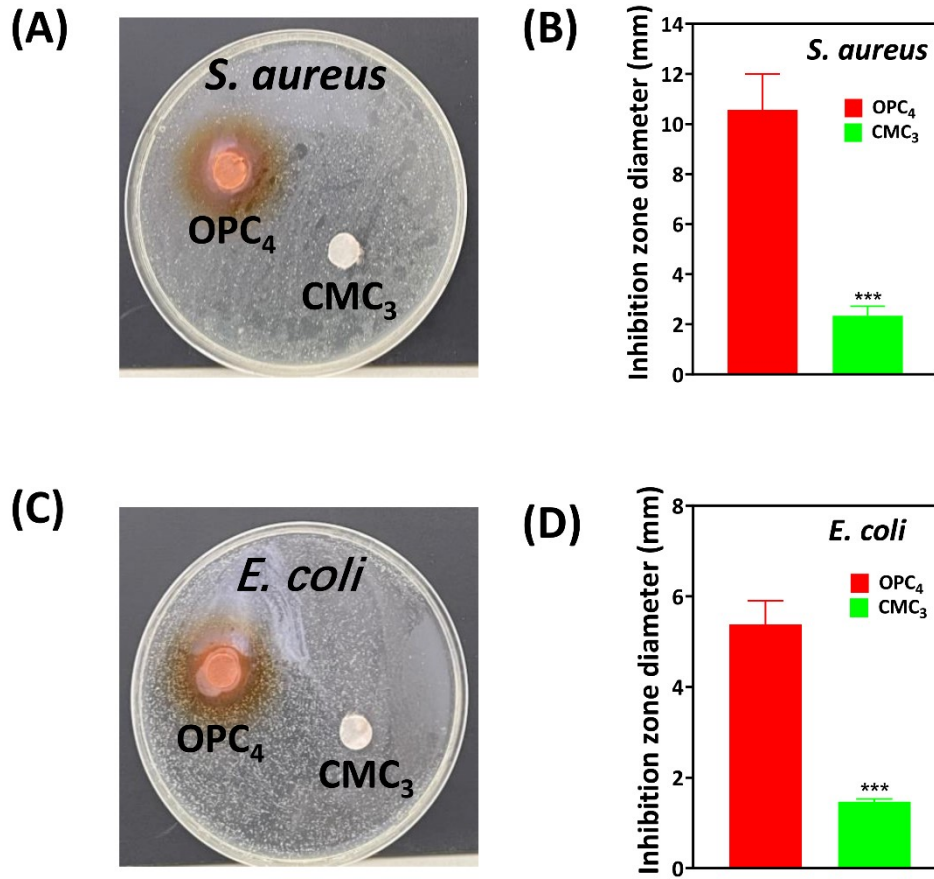

**Figure S2** Photographs and quantitative statistics of inhibition zone against *S. aureus* (A, B) and *E. coli* (C, D) in the zone of inhibition test. CMC<sub>3</sub>, 3% CMCS solution; OPC<sub>4</sub>, 4% OPC solution.

Data are reported as means  $\pm$  SD.
